# Supplementary material for: Global and regional estimates of COPD prevalence: Systematic review and meta–analysis
Source: PubMed Central journal article supplement (PMC4693508; doi:10.7189/jogh.05-020415), 2015-12
Supplement: jogh-05-020415-s001.pdf [file jogh-05-020415-s001.pdf]

## Online Supplementary Document

Adeloye et al. Global and regional estimates of COPD prevalence: Systematic review and meta-analysis

J Glob Health 2015;5:020415

**Supplementary Table 1. Search terms (MEDLINE)**

| #  | Searches                                                                                                                                                                                                                                         |
|----|--------------------------------------------------------------------------------------------------------------------------------------------------------------------------------------------------------------------------------------------------|
| 1  | exp vital statistics/ or exp incidence/                                                                                                                                                                                                          |
| 2  | (incidence* or prevalence* or morbidity or mortality).tw.                                                                                                                                                                                        |
| 3  | (disease adj3 burden).tw.                                                                                                                                                                                                                        |
| 4  | exp "cost of illness"/                                                                                                                                                                                                                           |
| 5  | exp quality-adjusted life years/                                                                                                                                                                                                                 |
| 6  | QALY.tw.                                                                                                                                                                                                                                         |
| 7  | Disability adjusted life years.mp.                                                                                                                                                                                                               |
| 8  | (initial adj2 burden).tw.                                                                                                                                                                                                                        |
| 9  | exp risk factors/                                                                                                                                                                                                                                |
| 10 | 1 or 2 or 3 or 4 or 5 or 6 or 7 or 8 or 9                                                                                                                                                                                                        |
| 11 | exp Emphysema/                                                                                                                                                                                                                                   |
| 12 | copd.mp.                                                                                                                                                                                                                                         |
| 13 | exp bronchitis, chronic/ or exp pulmonary disease, chronic obstructive/ or exp pulmonary emphysema/                                                                                                                                              |
| 14 | chronic obstructive airway disease.mp. [mp=title, abstract, original title, name of substance word, subject heading word, keyword heading word, protocol supplementary concept word, rare disease supplementary concept word, unique identifier] |
| 15 | coad.mp. [mp=title, abstract, original title, name of substance word, subject heading word, keyword heading word, protocol supplementary concept word, rare disease supplementary concept word, unique identifier]                               |
| 16 | 11 or 12 or 13 or 14 or 15                                                                                                                                                                                                                       |
| 17 | 10 and 16                                                                                                                                                                                                                                        |
| 18 | limit 17 to yr="1990 -Current"                                                                                                                                                                                                                   |

## Supplementary Table 2. Search Terms (EMBASE)

| #  | Searches                                                                                |
|----|-----------------------------------------------------------------------------------------|
| 1  | exp vital statistics/ or exp incidence/                                                 |
| 2  | (incidence* or prevalence* or morbidity or mortality).tw.                               |
| 3  | (disease adj3 burden).tw.                                                               |
| 4  | exp "cost of illness"/                                                                  |
| 5  | exp quality-adjusted life years/                                                        |
| 6  | QALY.tw.                                                                                |
| 7  | Disability adjusted life years.mp.                                                      |
| 8  | (initial adj2 burden).tw.                                                               |
| 9  | exp risk factors/                                                                       |
| 10 | 1 or 2 or 3 or 4 or 5 or 6 or 7 or 8 or 9                                               |
| 11 | exp Emphysema/                                                                          |
| 12 | copd.mp.                                                                                |
| 13 | coad.mp. [mp=abstract, title, original title, broad terms, heading words]               |
| 14 | chronic bronchitis.mp. [mp=abstract, title, original title, broad terms, heading words] |
| 15 | exp chronic obstructive pulmonary disease/                                              |
| 16 | 11 or 12 or 13 or 14 or 15                                                              |
| 17 | 10 and 16                                                                               |
| 18 | limit 21 to yr="1990 -Current"                                                          |

### Supplementary Table 3. Search Terms (GLOBAL HEALTH)

| #  | Searches                                                                                |
|----|-----------------------------------------------------------------------------------------|
| 1  | exp vital statistics/ or exp incidence/                                                 |
| 2  | (incidence* or prevalence* or morbidity or mortality).tw.                               |
| 3  | (disease adj3 burden).tw.                                                               |
| 4  | exp "cost of illness"/                                                                  |
| 5  | exp quality-adjusted life years/                                                        |
| 6  | QALY.tw.                                                                                |
| 7  | Disability adjusted life years.mp.                                                      |
| 8  | (initial adj2 burden).tw.                                                               |
| 9  | exp risk factors/                                                                       |
| 10 | 1 or 2 or 3 or 4 or 5 or 6 or 7 or 8 or 9                                               |
| 11 | exp Emphysema/                                                                          |
| 12 | copd.mp.                                                                                |
| 13 | coad.mp. [mp=abstract, title, original title, broad terms, heading words]               |
| 14 | chronic bronchitis.mp. [mp=abstract, title, original title, broad terms, heading words] |
| 15 | exp chronic obstructive pulmonary disease/                                              |
| 16 | 11 or 12 or 13 or 14 or 15                                                              |
| 17 | 10 and 16                                                                               |
| 18 | limit 17 to yr="1990 -Current"                                                          |

**Supplementary Table 4. Characteristics of retained COPD studies globally**

| Study                 | Study period | Country      | Income category | WHO region | Setting | Diagnosis criteria  | Mean age | Sample size | COPD cases | Prevalence |
|-----------------------|--------------|--------------|-----------------|------------|---------|---------------------|----------|-------------|------------|------------|
| Khelafi et al         | 2010         | Algeria      | LMIC            | AFRO       | Mixed   | GOLD                | 47.5     | 1800        | 87         | 4.9        |
| Martins et al         | 2006         | Cape Verde   | LMIC            | AFRO       | Mixed   | GOLD                | 41.7     | 274         | 23         | 8.4        |
| Fullerton et al       | 2001         | Malawi       | LMIC            | AFRO       | Mixed   | GOLD                | 46       | 332         | 45         | 13.6       |
| Gathuru et al         | 1999         | Nigeria      | LMIC            | AFRO       | Urban   | LLN                 | 47.6     | 270         | 25         | 9.3        |
| Musafiri et al        | 2009         | Rwanda       | LMIC            | AFRO       | Mixed   | ATS/ERS             | 38.3     | 1824        | 82         | 4.5        |
| Buist et al           | 2005         | South Africa | LMIC            | AFRO       | Urban   | GOLD                | 53.6     | 847         | 202        | 23.8       |
| Tan et al             | 2007         | Canada       | HIC             | AMRO       | Urban   | GOLD/LLN            | 57       | 2916        | 487        | 11.6       |
| Al-Hazmi et al        | 1994         | Canada       | HIC             | AMRO       | Urban   | GOLD                | 32       | 2819        | 186        | 6.6        |
| Tilert et al          | 2009         | USA          | HIC             | AMRO       | Urban   | GOLD/LLN            | 59.5     | 5447        | 763        | 10.2       |
| Methvin et al         | 2005         | USA          | HIC             | AMRO       | Urban   | GOLD                | 57.1     | 508         | 100        | 19.6       |
| Mannino et al         | 1991         | USA          | HIC             | AMRO       | Urban   | GOLD                | 42.8     | 16084       | 1367       | 6.8        |
| Ford et al            | 2010         | USA          | HIC             | AMRO       | Urban   | GOLD                | 49.5     | 9024        | 1218       | 13.5       |
| Vaz Fragoso et al     | 2000         | USA          | HIC             | AMRO       | Urban   | GOLD                | 60       | 3502        | 947        | 27.0       |
| Menezes et al         | 2001         | Brazil       | LMIC            | AMRO       | Urban   | GOLD                | 51.2     | 191         | 29         | 15.2       |
| Caballero et al       | 2004         | Colombia     | LMIC            | AMRO       | Urban   | GOLD                | 55.8     | 5539        | 494        | 8.9        |
| Laniado-Laborin et al | 2008         | Mexico       | LMIC            | AMRO       | Urban   | GOLD                | 58       | 2293        | 472        | 20.6       |
| Menezes et al         | 2003         | Brazil       | LMIC            | AMRO       | Urban   | GOLD                | 55.2     | 1000        | 158        | 15.8       |
| Menezes et al         | 2003         | Chile        | HIC             | AMRO       | Urban   | GOLD                | 57       | 1208        | 204        | 16.9       |
| Menezes et al         | 2003         | Mexico       | LMIC            | AMRO       | Urban   | GOLD                | 55.9     | 1063        | 83         | 7.8        |
| Menezes et al         | 2003         | Uruguay      | HIC             | AMRO       | Urban   | GOLD                | 60.3     | 943         | 186        | 19.7       |
| Menezes et al         | 2003         | Venezuela    | LMIC            | AMRO       | Urban   | GOLD                | 51.1     | 1357        | 164        | 12.1       |
| Amra et al            | 2010         | Iran         | LMIC            | EMRO       | Mixed   | ERS                 | 53.5     | 420         | 71         | 16.9       |
| Golshan et al         | 1998         | Iran         | LMIC            | EMRO       | Mixed   | GOLD                | 51.95    | 4636        | 788        | 17.0       |
| Golshan et al         | 2010         | Iran         | LMIC            | EMRO       | Mixed   | GOLD                | 58       | 279         | 62         | 22.2       |
| Waked et al           | 2010         | Lebanon      | LMIC            | EMRO       | Mixed   | GOLD/LLN            | 57.1     | 2201        | 284        | 12.5       |
| Daldoul et al         | 2012         | Tunisia      | LMIC            | EMRO       | Urban   | GOLD                | 59.5     | 661         | 49         | 7.4        |
| Al Zaabi et al        | 2010         | UAE          | HIC             | EMRO       | Urban   | GOLD                | 52       | 520         | 19         | 3.7        |
| Al Ghobain            | 2011         | Saudi Arabia | HIC             | EMRO       | Urban   | GOLD                | 52       | 501         | 71         | 14.2       |
| Stav et al            | 2007         | Israel       | HIC             | EURO       | Mixed   | GOLD                | 60       | 1058        | 233        | 22.0       |
| Weiss et al           | 2007         | Austria      | HIC             | EURO       | Mixed   | GOLD                | 58.5     | 775         | 58         | 16.6       |
| Schirnhofner et al    | 2005         | Austria      | HIC             | EURO       | Urban   | GOLD                | 59       | 1258        | 328        | 26.1       |
| Maio et al            | 2009         | Austria      | HIC             | EURO       | Urban   | GOLD                | 41.1     | 1526        | 311        | 20.4       |
| Fabricius et al       | 2003         | Denmark      | HIC             | EURO       | Urban   | GOLD                | 62.6     | 4908        | 853        | 17.4       |
| Hansen et al          | 2005         | Denmark      | HIC             | EURO       | Mixed   | GOLD                | 65.2     | 4535        | 541        | 11.9       |
| Maio et al            | 2009         | Denmark      | HIC             | EURO       | Urban   | GOLD                | 39.8     | 1037        | 263        | 25.4       |
| Kainu et al           | 2002         | Finland      | HIC             | EURO       | Urban   | GOLD/LLN            | 49.1     | 628         | 37         | 5.9        |
| Kotaniemi et al       | 2004         | Finland      | HIC             | EURO       | Rural   | GOLD                | 47.9     | 683         | 64         | 9.4        |
| Isoaho et al          | 1991         | Finland      | HIC             | EURO       | Rural   | FEV1/FVC $\leq$ 65% | 73       | 1196        | 82         | 7.8        |
| Kanervisto et al      | 2001         | Finland      | HIC             | EURO       | Mixed   | GOLD                | 55       | 6525        | 338        | 5.2        |
| Roche et al           | 2007         | France       | HIC             | EURO       | Urban   | GOLD                | 62.8     | 4335        | 325        | 7.5        |
| Geldmacher et al      | 2005         | Germany      | HIC             | EURO       | Mixed   | GOLD                | 57.9     | 683         | 90         | 13.2       |

|                                     |      |             |      |      |       |          |      |        |      |      |
|-------------------------------------|------|-------------|------|------|-------|----------|------|--------|------|------|
| <b>Gingter et al</b>                | 2007 | Germany     | HIC  | EURO | Urban | GOLD     | 59.5 | 432    | 40   | 9.3  |
| <b>Schikowski et al*</b>            | 1994 | Germany     | HIC  | EURO | Urban | GOLD     | .    | .      | .    | .    |
| <b>Maio et al</b>                   | 2009 | Germany     | HIC  | EURO | Urban | GOLD     | 43   | 4576   | 841  | 18.4 |
| <b>Sichletidis et al</b>            | 2001 | Greece      | HIC  | EURO | Mixed | GOLD     | 52.3 | 6112   | 341  | 5.6  |
| <b>Minas et al</b>                  | 2008 | Greece      | HIC  | EURO | Rural | GOLD     | 53.9 | 1526   | 281  | 18.4 |
| <b>Benediktsdottir et al</b>        | 2004 | Iceland     | HIC  | EURO | Urban | GOLD     | 57   | 755    | 136  | 18.0 |
| <b>Viegi et al</b>                  | 1990 | Italy       | HIC  | EURO | Rural | GOLD     | 44.6 | 1727   | 261  | 15.1 |
| <b>Vanfleteren et al</b>            | 2008 | Netherlands | HIC  | EURO | Urban | GOLD/LLN | 59.5 | 592    | 140  | 18.7 |
| <b>Van Durme et al</b>              | 2003 | Netherlands | HIC  | EURO | Urban | GOLD     | 69.5 | 7983   | 928  | 11.6 |
| <b>Afonso et al</b>                 | 2007 | Netherlands | HIC  | EURO | Mixed | GOLD     | 58.4 | 185325 | 7308 | 3.9  |
| <b>Waatevik et al</b>               | 2004 | Norway      | HIC  | EURO | Mixed | GOLD     | 54.7 | 1664   | 228  | 8.7  |
| <b>Hvidsten et al</b>               | 1999 | Norway      | HIC  | EURO | Mixed | GOLD     | 60.8 | 3305   | 303  | 9.2  |
| <b>Buist et al</b>                  | 2005 | Norway      | HIC  | EURO | Urban | GOLD     | 58.5 | 658    | 124  | 18.8 |
| <b>Bakke et al</b>                  | 1990 | Norway      | HIC  | EURO | Mixed | GOLD     | 42   | 1275   | 65   | 5.4  |
| <b>Johannessen et al</b>            | 2003 | Norway      | HIC  | EURO | Mixed | GOLD     | 46   | 869    | 40   | 4.6  |
| <b>Bednarek et al</b>               | 2007 | Poland      | HIC  | EURO | Mixed | LLN      | 56.7 | 1960   | 183  | 9.3  |
| <b>Nizankowska-Mogilnicka et al</b> | 2005 | Poland      | HIC  | EURO | Mixed | GOLD     | 55.7 | 526    | 116  | 22.1 |
| <b>Plywaczewski et al</b>           | 2001 | Poland      | HIC  | EURO | Urban | GOLD     | 49.4 | 676    | 72   | 10.7 |
| <b>Paprzycki et al</b>              | 2000 | Poland      | HIC  | EURO | Rural | GOLD     | 49.6 | 643    | 73   | 11.0 |
| <b>Siatkowska et al</b>             | 2009 | Poland      | HIC  | EURO | Mixed | GOLD     | 58.7 | 1026   | 62   | 6.0  |
| <b>Barbara et al</b>                | 2008 | Portugal    | HIC  | EURO | Urban | GOLD     | 62.8 | 710    | 101  | 14.2 |
| <b>Cardoso et al</b>                | 1995 | Portugal    | HIC  | EURO | Mixed | GOLD     | 56.4 | 9061   | 815  | 9.0  |
| <b>Cardoso et al</b>                | 2002 | Portugal    | HIC  | EURO | Mixed | GOLD     | 48.6 | 1384   | 73   | 5.3  |
| <b>Mascarenhas et al</b>            | 2001 | Portugal    | HIC  | EURO | Urban | GOLD     | 58.5 | 758    | 81   | 10.7 |
| <b>Grzetic-Romcevic et al</b>       | 2005 | Slovenia    | HIC  | EURO | Urban | GOLD     | 56.5 | 770    | 79   | 10.3 |
| <b>Miravittles et al</b>            | 2007 | Spain       | HIC  | EURO | Mixed | GOLD     | 56.6 | 3802   | 386  | 10.2 |
| <b>Peña et al</b>                   | 1997 | Spain       | HIC  | EURO | Mixed | ERS      | 53.9 | 3981   | 363  | 9.1  |
| <b>Cabrera-Lopez et al</b>          | 2012 | Spain       | HIC  | EURO | Urban | GOLD     | 55   | 1001   | 73   | 7.3  |
| <b>Danielsson et al</b>             | 2007 | Sweden      | HIC  | EURO | Urban | LLN      | 58.9 | 548    | 86   | 10.0 |
| <b>Lindberg et al</b>               | 1996 | Sweden      | HIC  | EURO | Rural | GOLD     | 61.5 | 1237   | 177  | 14.3 |
| <b>Lindberg et al</b>               | 1994 | Sweden      | HIC  | EURO | Rural | GOLD     | 49.1 | 666    | 94   | 14.1 |
| <b>Lindberg et al</b>               | 1996 | Sweden      | HIC  | EURO | Rural | GOLD     | 61.5 | 963    | 107  | 11.1 |
| <b>Ekberg-Aronsson et al</b>        | 2002 | Sweden      | HIC  | EURO | Mixed | GOLD     | 32   | 22044  | 3364 | 15.3 |
| <b>Lindström et al</b>              | 1994 | Sweden      | HIC  | EURO | Rural | BTS      | 50.5 | 1580   | 166  | 10.5 |
| <b>Hasselgren et al</b>             | 1995 | Sweden      | HIC  | EURO | Rural | BTS      | 45.4 | 206    | 4    | 2.1  |
| <b>Larsson et al</b>                | 1991 | Sweden      | HIC  | EURO | Mixed | ATS      | 49.5 | 1970   | 87   | 10.8 |
| <b>Maio et al</b>                   | 2009 | Sweden      | HIC  | EURO | Urban | GOLD     | 40.5 | 2417   | 486  | 20.1 |
| <b>Bridevaux et al</b>              | 2002 | Switzerland | HIC  | EURO | Mixed | GOLD     | 53.7 | 6126   | 307  | 5.0  |
| <b>Arslan et al</b>                 | 2012 | Turkey      | LMIC | EURO | Urban | GOLD     | 55.8 | 946    | 126  | 13.3 |
| <b>Erdogan et al</b>                | 2012 | Turkey      | LMIC | EURO | Rural | GOLD     | 55   | 500    | 25   | 5.0  |

|                                |      |               |      |       |       |         |      |       |       |      |
|--------------------------------|------|---------------|------|-------|-------|---------|------|-------|-------|------|
| <b>Deveci et al</b>            | 2007 | Turkey        | LMIC | EURO  | Mixed | GOLD    | 37.7 | 1188  | 53    | 4.5  |
| <b>Gunen et al</b>             | 2007 | Turkey        | LMIC | EURO  | Mixed | ATS/ERS | 47.5 | 1160  | 80    | 6.9  |
| <b>Buist et al</b>             | 2005 | Turkey        | LMIC | EURO  | Mixed | GOLD    | 53.8 | 806   | 155   | 19.2 |
| <b>Jordan et al</b>            | 1998 | UK            | HIC  | EURO  | Mixed | GOLD    | 58.1 | 18817 | 1684  | 9.0  |
| <b>Melville et al</b>          | 2003 | UK            | HIC  | EURO  | Urban | GOLD    | 59   | 845   | 211   | 25.0 |
| <b>Murtagh et al</b>           | 2000 | UK            | HIC  | EURO  | Mixed | BTS     | 55.5 | 722   | 49    | 6.8  |
| <b>Dickinson et al</b>         | 1998 | UK            | HIC  | EURO  | Mixed | GOLD    | 68.4 | 353   | 35    | 9.9  |
| <b>Renwick et al</b>           | 1993 | UK            | HIC  | EURO  | Mixed | GOLD    | 64.5 | 246   | 65    | 26.4 |
| <b>Shahab et al</b>            | 2001 | UK            | HIC  | EURO  | Mixed | GOLD    | 56.5 | 8215  | 1093  | 13.3 |
| <b>Maio et al</b>              | 2009 | UK            | HIC  | EURO  | Urban | GOLD    | 39.6 | 825   | 200   | 24.2 |
| <b>de Marco et al</b>          | 1992 | International | HIC  | EURO  | Mixed | GOLD    | 32   | 1942  | 70    | 3.6  |
| <b>Zachariades et al</b>       | 2012 | Cyprus        | HIC  | EURO  | Mixed | GOLD    | 54.5 | 1233  | 60    | 4.9  |
| <b>Islam et al</b>             | 2012 | Bangladesh    | LMIC | SEARO | Urban | GOLD    | 45.3 | 900   | 103   | 11.4 |
| <b>Mosharraf-Hossain et al</b> | 2009 | Bangladesh    | LMIC | SEARO | Urban | GOLD    | 53.7 | 400   | 50    | 12.5 |
| <b>Maranetra et al</b>         | 1998 | Thailand      | LMIC | SEARO | Urban | GOLD    | 67.9 | 3094  | 220   | 7.1  |
| <b>Parasuramalu et al</b>      | 2013 | India         | LMIC | SEARO | Rural | GOLD    | 50.8 | 1400  | 61    | 4.4  |
| <b>Johnson et al*</b>          | 2007 | India         | LMIC | SEARO | Rural | GOLD    | .    | .     | .     | .    |
| <b>Mahesh et al</b>            | 2009 | India         | LMIC | SEARO | Rural | GOLD    | 44.5 | 350   | 17    | 4.9  |
| <b>Toelle et al</b>            | 2008 | Australia     | HIC  | WPRO  | Mixed | GOLD    | 58.9 | 3357  | 487   | 14.5 |
| <b>Matheson et al</b>          | 2004 | Australia     | HIC  | WPRO  | Urban | GOLD    | 57.3 | 1213  | 42    | 3.5  |
| <b>Shirtcliffe et al</b>       | 2004 | New Zealand   | HIC  | WPRO  | Urban | GOLD    | 50.1 | 749   | 116   | 15.5 |
| <b>Buist et al</b>             | 2005 | China         | LMIC | WPRO  | Urban | GOLD    | 54   | 473   | 54    | 11.4 |
| <b>Liu et al</b>               | 2003 | China         | LMIC | WPRO  | Mixed | GOLD    | 57   | 3286  | 310   | 9.4  |
| <b>Zhong et al</b>             | 2003 | China         | LMIC | WPRO  | Mixed | GOLD    | 56.7 | 20245 | 1668  | 8.2  |
| <b>Qiu et al</b>               | 2012 | China         | LMIC | WPRO  | Mixed | GOLD    | 56   | 4055  | 360   | 8.9  |
| <b>Rong et al</b>              | 2009 | China         | LMIC | WPRO  | Rural | GOLD    | 40.5 | 2568  | 100   | 3.9  |
| <b>Li et al</b>                | 2008 | China         | LMIC | WPRO  | Urban | GOLD    | 59.5 | 1518  | 194   | 12.8 |
| <b>Gong et al</b>              | 2009 | China         | LMIC | WPRO  | Urban | GOLD    | 70   | 710   | 104   | 14.6 |
| <b>Ling et al</b>              | 2010 | China         | LMIC | WPRO  | Rural | GOLD    | 49.5 | 3489  | 138   | 4.0  |
| <b>Ma et al</b>                | 2012 | China         | LMIC | WPRO  | Rural | GOLD    | 59.5 | 1554  | 173   | 11.1 |
| <b>Zeng et al</b>              | 2009 | China         | LMIC | WPRO  | Urban | GOLD    | 60.4 | 3687  | 354   | 9.6  |
| <b>Li et al</b>                | 2011 | China         | LMIC | WPRO  | Rural | GOLD    | 59.5 | 1384  | 136   | 9.8  |
| <b>Liu et al</b>               | 2009 | China         | LMIC | WPRO  | Rural | GOLD    | 65   | 5420  | 947   | 17.5 |
| <b>Liu et al</b>               | 2007 | China         | LMIC | WPRO  | Mixed | GOLD    | 54.5 | 3286  | 310   | 9.4  |
| <b>Zhang et al</b>             | 2008 | China         | LMIC | WPRO  | Rural | GOLD    | 59.5 | 2001  | 172   | 8.6  |
| <b>Yu et al</b>                | 2008 | China         | LMIC | WPRO  | Rural | GOLD    | 55.5 | 1948  | 209   | 10.7 |
| <b>Wang et al</b>              | 2010 | China         | LMIC | WPRO  | Urban | GOLD    | 59.5 | 2055  | 156   | 7.6  |
| <b>Jiang et al</b>             | 2006 | China         | LMIC | WPRO  | Rural | GOLD    | 59.5 | 1883  | 186   | 9.9  |
| <b>Yao et al</b>               | 2004 | China         | LMIC | WPRO  | Rural | GOLD    | 59.5 | 1624  | 148   | 9.1  |
| <b>Wang et al</b>              | 2004 | China         | LMIC | WPRO  | Rural | GOLD    | 54.3 | 1468  | 176   | 12.0 |
| <b>Yin et al</b>               | 2006 | China         | LMIC | WPRO  | Urban | GOLD    | 61.7 | 6497  | 773   | 11.9 |
| <b>Smith et al</b>             | 2008 | China         | LMIC | WPRO  | Mixed | GOLD    | 54.5 | 31739 | 13013 | 4.1  |
| <b>Zhou et al</b>              | 2009 | China         | LMIC | WPRO  | Mixed | GOLD    | 54.9 | 12471 | 462   | 3.7  |

|                        |      |             |      |      |       |               |      |       |     |      |
|------------------------|------|-------------|------|------|-------|---------------|------|-------|-----|------|
| <b>Ko et al</b>        | 2006 | Hong Kong   | HIC  | WPRO | Urban | GOLD          | 74.2 | 1008  | 261 | 25.9 |
| <b>Lau et al</b>       | 2003 | Hong Kong   | HIC  | WPRO | Urban | GOLD          | 50   | 525   | 101 | 19.2 |
| <b>Nishimura et al</b> | 2011 | Japan       | HIC  | WPRO | Urban | GOLD          | 56   | 1333  | 67  | 5.0  |
| <b>Fukahori et al</b>  | 2005 | Japan       | HIC  | WPRO | Urban | GOLD          | 66   | 1424  | 193 | 13.6 |
| <b>Takemura et al</b>  | 1999 | Japan       | HIC  | WPRO | Urban | GOLD          | 47.1 | 12760 | 459 | 3.6  |
| <b>Fukuchi et al</b>   | 2000 | Japan       | HIC  | WPRO | Mixed | GOLD          | 58   | 2343  | 256 | 10.9 |
| <b>Kojima et al</b>    | 2002 | Japan       | HIC  | WPRO | Urban | GOLD          | 49.5 | 11460 | 213 | 1.9  |
| <b>Yoo et al</b>       | 2008 | South Korea | HIC  | WPRO | Mixed | GOLD          | 59   | 2501  | 335 | 13.4 |
| <b>Hwang et al</b>     | 2008 | South Korea | HIC  | WPRO | Mixed | GOLD          | 59.5 | 6934  | 894 | 10.3 |
| <b>Kim et al</b>       | 2003 | South Korea | HIC  | WPRO | Urban | GOLD          | 50.5 | 3642  | 134 | 3.7  |
| <b>Kim et al</b>       | 2002 | South Korea | HIC  | WPRO | Mixed | GOLD          | 62.5 | 1673  | 288 | 16.2 |
| <b>Shin et al</b>      | 2000 | South Korea | HIC  | WPRO | Urban | ATS           | 45.8 | 1160  | 119 | 10.3 |
| <b>Fishwick et al</b>  | 1996 | New Zealand | HIC  | WPRO | Mixed | FEV1/FVC<75 % | 32   | 1132  | 24  | 2.1  |
| <b>Idolor et al</b>    | 2010 | Philippines | LMIC | WPRO | Rural | GOLD          | 53.5 | 722   | 141 | 20.8 |
| <b>Buist et al</b>     | 2005 | Philippines | LMIC | WPRO | Urban | GOLD          | 52.9 | 893   | 124 | 13.9 |
| <b>Lam et al</b>       | 2013 | Philippines | LMIC | WPRO | Mixed | GOLD          | 47.5 | 565   | 40  | 7.1  |

*\*no overall estimate reported*
